# Supplementary material
Source: publisher site journal article supplement (https://www.spandidos-publications.com/5365/downloadSupplementary)

Figure S1. Effect of SHCBP1 on the mRNA expression levels of EIF5A in CC cells. Stable knockdown and over-expression of SHCBP1 were developed in SiHa and CaSki cells. (A) mRNA expression levels of EIF5A in stable SHCBP1-overexpressing CaSki cell lines. Data were analyzed with unpaired t-test. (B) mRNA expression levels of EIF5A in stable SHCBP1-silenced SiHa cell lines. Data were analyzed with one-way ANOVA followed by Tukey tests. Data are presented as the mean  $\pm$  SD. \*\*P<0.01 vs. empty vector group. ##P<0.01 vs. NC shRNA group. n=3. CC, cervical cancer; EIF5A, eukaryotic translation initiation factor 5A; NC, negative control; OE, overexpression; SHCBP1, SHC binding and spindle associated 1; shRNA, short hairpin RNA.

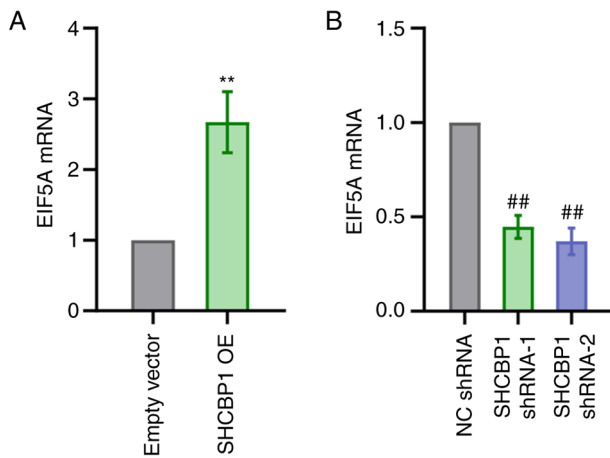

Supplement: Supplementary file 1 [file downloadSupplementary]
